# Supplementary material
Source: PubMed Central journal article supplement (PMC3967590)
Supplement: NIHMS562821-supplement-Supplementary.pdf [file NIHMS562821-supplement-Supplementary.pdf]

## **Supplementary Materials, Shah et al**

- 1) Supplementary Methods**
- 2) Supplementary References**
- 3) Supplementary Tables**

### **Supplementary Methods.**

*Human tissue specimens:* Normal breast organoid RNA was prepared as reported (10). Briefly, tissues from reduction mammoplasty performed at Johns Hopkins Hospital were mechanically macerated, and then digested overnight with hyaluronic acid and collagenase. The terminal ductal units were placed into suspension, and then isolated by serial filtration. Samples were treated with TRIzol and RNA extracted.

Fresh frozen primary breast tumors were obtained from the Department of Surgical Pathology tumor bank; specimens were from patients 45-55 years of age with localized disease, with positive estrogen receptor expression by immunohistochemistry as performed during routine staging at diagnosis, for uniformity of samples.

Metastatic breast carcinoma samples were obtained from the Rapid Autopsy Program at Johns Hopkins Hospital. All specimens were fast frozen at autopsy and stored at -80°. Twenty 20-micron-thick sections were obtained from tumor metastases to the liver (for use on the tiling array) or other body sites (for validation studies). These slices were macerated with the BioMasher sample preparation device (Cartagen), with 350 uL of lysis buffer from the Qiagen RNEasy Mini Extraction kit. RNA extraction was completed with the flow-through from the BioMasher, as per the manufacturer protocol. 10 micron-thick H&E-stained tissue sections were made from all tumor samples and were confirmed to have at least 70% non-necrotic neoplastic epithelial cellularity before RNA extraction. Tissue samples were accessed after obtaining the appropriate approval from the Johns Hopkins Medical Institutions IRB Board.

*RT-qPCR validation of gene expression:* RNA from primary tissue samples was extracted using the RNEasy Mini Extraction kit (Qiagen). RNA from cell lines was extracted from cells grown to 90% confluency in 6-well plates, using TRIzol reagent (Life Technologies). RNA was reverse-transcribed using Superscript III, and 1  $\mu$ L of yield was used in for qPCR. Taqman® Gene Expression Assays for HOXB13 (Hs00197189\_m1) and GAPDH (Hs99999905\_m1) were used as primers and gene-specific fluorescent probes for PCR, using RampTaq polymerase (Denville Scientific) and supplied buffer. Primers for all other qPCR are listed in Supplementary Table 1 below, using the Maxima SYBR Green/ROX Master Mix (Fermentas), per manufacturer protocol. qPCR was performed per manufacturer protocol, using the Applied Biosystem 7500 Real-Time PCR system for 40 cycles. A detection threshold of 0.01 was set for determination of Ct for each reaction. For each sample, qPCR was performed to measure the gene of experimental interest (e.g. HOXB13) and GAPDH expression; each sample was tested in triplicate. The  $\Delta\Delta C_t$  method (GAPDH used for normalization) was used to determine the expression of the gene in each reaction separately, using average lowest expression in organoid tissue as baseline. Relative expression was calculated as  $2^{(-\Delta\Delta C_t)}$ , and the three expression values averaged to determine HOXB13 expression in each sample.. Expression was calculated using the  $\Delta\Delta C_t$  method as described above, using detection threshold of 0.01.

*Plasmid Constructs, Viral Packaging, and Cell infection:* A plasmid containing the full length cDNA of human HOXB13 in the pDNR-LIB vector (catalog number [MHS1011-62759](#)), a set of short-hairpin RNA microRNA (shRNAmir) lentiviral constructs targeted against the HOXB13 mRNA (RHS4533), and a nonsilencing lentiviral shRNAmir (RHS4346) were purchased from Open Biosystems. The HOXB13-pDNR-LIB vector was digested with the restriction endonuclease Sfi1 and the HOXB13 cDNA ligated into the retroviral vector pLPCX (Clontech) with T4 DNA ligase. The plasmid was transformed into Turbocells competent E. coli (Genlantis) per manufacturer protocol, which were then selected on LB agar supplemented with ampicillin (100  $\mu$ g/mL). The resultant plasmid and the shRNAmir plasmids were amplified in LB broth with

ampicillin and purified with the QuantumPrep Plasmid Midiprep kit (Biorad). Sequences were confirmed with the Applied Biosystems 3730xl DNA Analyzer. The plasmids were then co-transfected with pCL-Ampho packaging vector (pLPCX) or psPAX2 and pMD2.G packaging vectors (lentiviral plasmids) into HEK-293T cells with Lipofectamine 2000 (Invitrogen), and viral supernatant collected at 36 and 72 hours.

MCF7 and T47D cells were treated with DEAE-dextran containing media, then the HOXB13-pLPCX, or pLPCX-vector control, viral supernatant for 24 hours. Infected cells were replated and treated with media containing puromycin, 0.2 µg/mL, for 2 weeks. Colonies were selected and HOXB13 expression evaluated; the colonies were also pooled and average HOXB13 expression evaluated.

The BT474 cell line was treated with DEAE-dextran containing media, then viral supernatant from either the nonsilencing shRNAmir (scramble) or constructs against HOXB13 for 24 hours. The cell lines were replated and treated with media containing puromycin, 0.1 µg/mL for 2 weeks. The propagated colonies were then re-infected with either shScramble, or HOXB13-targeting shRNAmir clones TRCN0000020844 (shHOXB13-1) or TRCN0000020845 (shHOXB13-2), and infected cells reselected with puromycin 0.2 µg/mL. The resultant pools (BT474-scramble, BT474-HOXB13-shRNA#1, and BT474-HOXB13-shRNA#2) were then tested to confirm HOXB13 expression. All cell lines were maintained in media supplemented with puromycin 0.2 µg/mL. Experiments were performed in media without puromycin.

*Western blot analysis:* Western blots were performed as previously described (29)  $2 \times 10^6$  cells were plated into 10 cm plates in complete media. After 24 hours, media was changed to either complete media with phenol red supplemented with 10% heat-inactivated fetal bovine serum, or phenol red-free media supplemented with 5% charcoal-stripped FBS. The medium was supplemented with either 2µM 4-hydroxytamoxifen (4-OH TAM) or vehicle alone. After four hours, cells were rinsed with PBS and lysed with RIPA buffer. 60 µg of extracted lysate were vertically electrophoresed on 4-12% Bis-Tris NuPage Novex Gel in MOPS SDS running buffer

(Invitrogen), then transferred to Hybond C Extra membrane (GE Healthcare). Membranes were stained with Ponceau stain to confirm protein transfer, then blocked with 5% powdered milk in PBS with 0.2% Tween-20 (PBST) for one hour at 25°C. Membranes were probed with primary antibody in 5% milk/PBST at 25°C for 2 hours, rinsed with PBST x 3, then probed with secondary antibody (either anti-rabbit-HRP or anti-mouse-HRP (GE Healthcare)) at 1:2000 dilution in 5% milk/PBST for 45 minutes. Membranes were rinsed with PBST x 3, then treated with ECL (or, for HOXB13, ECL Plus) Detection Reagent (GE Healthcare) for 1 minute. Membranes were exposed to Hyblot CL autoradiography film to determine protein expression. A list of antibodies used can be found in Table 2 below.

*Chromatin Immunoprecipitation (ChIP):* ChIP was performed with the EZChip kit (Millipore) according to protocol.  $2.5 \times 10^6$  cells were seeded into 15 cm plates and grown to 90% confluency. Protein and DNA were crosslinked with 1% formaldehyde in water and collected. Cells were sonicated with a Branson 450 ultrasonicator (4 cycles of 30 seconds each, 30% Duty cycle, output 4) on ice. The resulting lysate was either stored as input DNA or immunoprecipitated with anti-HOXB13 antibody (F-9, Santa Cruz), normal mouse IgG, or anti-RNA Polymerase II (Millipore) overnight at 4°C after preclearing, then complexes collected with ChIP-grade Protein G Agarose. The DNA crosslinking was reversed and DNA purified by spin column. 2  $\mu$ L of the eluted DNA was then used for PCR, using primers designed to noted regions of the IL6 or CXCL12 promoter, extending 2000 bp upstream of the transcription start site (listed in Table 1 below). PCR was performed using BlueTaq polymerase (Denville Scientific), using the provided buffer, per manufacturer protocol, under the following cycle conditions: 95°C for 2 min x 1 cycle, then 95°C for 30 sec, 58°C for 30 sec, and 72°C for 30 sec x 30 cycles, then 72°C for 2 min. Half of each reaction was run on 1% agarose/LB gel. Amplification in the input and anti-HOXB13 fractions and lack of amplification in the normal IgG fraction were indicative of specific binding of the probed DNA region by the HOXB13 antibody.

*Tumor xenograft studies:* 6-8 week old female athymic nude mice were used, and study approved by Johns Hopkins Animal Use Committee. E<sub>2</sub> and TAM pellets were made as previously described (30), using mixtures of 1:3 17-β estradiol:cholesterol or 1:1 TAM:cholesterol, and implanted subcutaneously (SC).

Cells were grown to 90% confluence, trypsinized, resuspended in PBS, and mixed 1:1 with Matrigel (BD Biosciences). Mice were anesthetized and the right 4<sup>th</sup> mammary fat pad (MFP) exposed. On day 0, the indicated cancer cells were injected into the 4th mammary fat pads (mfp) (1.5x10<sup>6</sup> cells) or SC (3x10<sup>6</sup> cells) suspended in 0.1 mL of 1:1 PBS/Matrigel (BD Biosciences) in separate sets of mice. 6 mice each were injected with each cell type without drug.

In a second experiment, mice were implanted with E<sub>2</sub> pellets. Three days later, the mice were injected with cancer cells (24 each group) as described. After 3 weeks, 6 mice each were treated with either 1) TAM implants SC; 2) Rapamycin, dissolved as previously described(31), injected intraperitoneally (IP) with a loading dose of 9 mg/kg on day 1, then 3 mg/kg every other day, 3) TAM implants and rapamycin, or 4) no additional treatment.

Mice were measured weekly for tumor growth. After 6 weeks, mice were euthanized and tumors were sectioned and fast-frozen, or Formalin-fixed and paraffin-embedded and H&E slides made.

Tumor volume was estimated by the calculation  $V=(\text{length} \times \text{width} \times \text{height} \times 0.5236)\text{mm}^3$ .

#### **Supplementary References:**

1. Gupta RA, Shah N, Wang KC, Kim J, Horlings HM, Wong DJ, et al. Long non-coding RNA HOTAIR reprograms chromatin state to promote cancer metastasis. *Nature* 2010 Apr 15;464(7291):1071-6.
2. Thiery JP. Epithelial-mesenchymal transitions in tumour progression. *Nat Rev Cancer* 2002 Jun;2(6):442-54.
3. Robinson SP, Jordan VC. Antiestrogenic action of toremifene on hormone-dependent, -independent, and heterogeneous breast tumor growth in the athymic mouse. *Cancer Res* 1989 Apr 1;49(7):1758-62.
4. Granville CA, Warfel N, Tsurutani J, Hollander MC, Robertson M, Fox SD, et al. Identification of a highly effective rapamycin schedule that markedly reduces the size,

multiplicity, and phenotypic progression of tobacco carcinogen-induced murine lung tumors. Clin Cancer Res 2007 Apr 1;13(7):2281-9.

## Supplementary Tables.

**Table S1:** Primers used for PCR

| Gene/Promoter Region | Forward Primer (5'-3') | Reverse Primer (5'-3') |
|----------------------|------------------------|------------------------|
| ESR1                 | ATGATCAACTGGGCGAAGA    | GGTGGACCTGATCATGGA     |
| IL6                  | AGTGAGGAACAAGCCAGAGC   | CAGGGGTGGTTATTGCATCT   |
| CXCL12               | GCATTGACCCGAAGCTAAAG   | CCCCACTTTTTCTTCTCTGC   |
| ESR1 Promoter Site 1 | TGCGATGCACCTAATGTGT    | ATCCCAAACACCCAACAGG    |
| ESR1 Promoter Site 2 | AACCTGTGGAAGGCATGAAC   | TGCCAGGACCTCAGTTCT     |
| ESR1 Promoter Site 3 | TCCGTCTTTCGCGTTTATTT   | ACGGGAGCAAGTGCAGTC     |
| IL6 Promoter Site 1  | TGCGTCCGTAGTTTCCTTCT   | CCCATTGCCACTGAGTCTCT   |
| IL6 Promoter Site 2  | AGGGAGAGCCAGAACACAGA   | CAGCACTTTGCATGTCTTG    |
| IL6 Promoter Site 3  | CAAGACATGCCAAAGTGCTG   | GCCTCAGACATCTCCAGTCC   |

**Table S2.** Antibodies used for Western Blot

| Antibody target   | Vendor         | Catalog number | Dilution |
|-------------------|----------------|----------------|----------|
| ER $\alpha$       | Santa Cruz     | sc-543         | 1:1000   |
| HoxB13            | Santa Cruz     | sc-28333       | 1:500    |
| $\beta$ -actin    | Sigma Aldrich  | A3853          | 1:3000   |
| Total Akt         | Cell Signaling | 4691           | 1:1000   |
| Total p70S6K      | Cell Signaling | 2708           | 1:1000   |
| p-Akt (Ser473)    | Cell Signaling | 4058           | 1:1000   |
| p-4EBP1           | Cell Signaling | 2855           | 1:1000   |
| Total 4EBP1       | Cell Signaling | 9452           | 1:1000   |
| p-STAT3           | Cell Signaling | 9131           | 1:1000   |
| Total STAT3       | Cell Signaling | 4904           | 1:1000   |
| p-p70S6K (Thr389) | Cell Signaling | 9234           | 1:1000   |

**Table S3** Treatment comparisons of tumor volumes at selected time points.

-MCF7-LPCX cell line, SC xenografts.

\*Tumor growth inhibition was analyzed using a mixed effects model by assuming an exchangeable covariance structure to account for correlation among measurements taken on the same animal. Tumor volume measured at week 3 was considered as a baseline and controlled for in the model. Tukey's procedure was used to adjust for multiple comparisons.

All pair-wise comparisons between treatments were presented in the following table at 4, 5, and 6 weeks, respectively. Unadjusted p values were also provided for your reference. Suggest reporting the adjusted p values.

| Treatment X | Treatment Y | Time (week) | Mean Difference | P value | Upper 95% CI | Lower 95% CI | Adjusted P value* | Adjusted Lower 95% CI* | Adjusted Upper 95% CI* |
|-------------|-------------|-------------|-----------------|---------|--------------|--------------|-------------------|------------------------|------------------------|
| Control     | Tam         | 4           | 28.8242         | 0.1023  | -6.2766      | 63.9249      | 0.3283            | -15.7993               | 73.4477                |
| Control     | Rapa        | 4           | 10.1391         | 0.5779  | -27.2048     | 47.4829      | 0.9419            | -37.3243               | 57.6025                |
| Control     | Rapa + Tam  | 4           | 24.2713         | 0.1691  | -11.1843     | 59.7269      | 0.4893            | -20.8086               | 69.3512                |
| Tam         | Rapa        | 4           | -18.6851        | 0.3095  | -56.0290     | 18.6588      | 0.7256            | -66.1485               | 28.7783                |
| Tam         | Rapa + Tam  | 4           | -4.5529         | 0.7919  | -40.0085     | 30.9027      | 0.9932            | -49.6328               | 40.5270                |
| Rapa        | Rapa + Tam  | 4           | 14.1322         | 0.4341  | -22.7443     | 51.0087      | 0.8552            | -32.7605               | 61.0250                |
| Control     | Tam         | 5           | 59.9784         | 0.0017  | 25.8032      | 94.1536      | 0.0028            | 16.9444                | 103.01                 |
| Control     | Rapa        | 5           | 53.9644         | 0.0060  | 17.5765      | 90.3523      | 0.0148            | 8.1440                 | 99.7848                |
| Control     | Rapa + Tam  | 5           | 69.5693         | 0.0005  | 34.8907      | 104.25       | 0.0005            | 25.8257                | 113.31                 |
| Tam         | Rapa        | 5           | -6.0140         | 0.7324  | -42.4019     | 30.3740      | 0.9855            | -51.8344               | 39.8065                |
| Tam         | Rapa + Tam  | 5           | 9.5910          | 0.5688  | -25.0876     | 44.2696      | 0.9376            | -34.1527               | 53.3346                |
| Rapa        | Rapa + Tam  | 5           | 15.6049         | 0.3752  | -20.4239     | 51.6338      | 0.8001            | -29.8313               | 61.0412                |
| Control     | Tam         | 6           | 91.1326         | <.0001  | 56.0318      | 126.23       | <.0001            | 46.5091                | 135.76                 |
| Control     | Rapa        | 6           | 97.7897         | <.0001  | 60.4459      | 135.13       | <.0001            | 50.3263                | 145.25                 |
| Control     | Rapa + Tam  | 6           | 114.87          | <.0001  | 78.7522      | 150.98       | <.0001            | 68.7281                | 161.01                 |
| Tam         | Rapa        | 6           | 6.6571          | 0.7143  | -30.6867     | 44.0010      | 0.9824            | -40.8063               | 54.1205                |
| Tam         | Rapa + Tam  | 6           | 23.7348         | 0.1869  | -12.3804     | 59.8500      | 0.5284            | -22.4045               | 69.8741                |
| Rapa        | Rapa + Tam  | 6           | 17.0777         | 0.3552  | -20.4091     | 54.5644      | 0.7812            | -30.7957               | 64.9510                |

**Table S4:** Treatment comparisons of tumor volumes at selected time points  
-MCF7-HOXB13 cell line, SC xenografts

| Treatment X | Treatment Y | Time (week) | Mean Difference | P value | Upper 95% CI | Lower 95% CI | Adjusted P value* | Adjusted Lower 95% CI* | Adjusted Upper 95% CI* |
|-------------|-------------|-------------|-----------------|---------|--------------|--------------|-------------------|------------------------|------------------------|
| Control     | Tam         | 4           | 89.4520         | 0.1507  | -34.459      | 213.36       | 0.4594            | -71.6140               | 250.52                 |
| Control     | Rapa        | 4           | 79.1192         | 0.1661  | -34.496      | 192.74       | 0.4959            | -69.4320               | 227.67                 |
| Control     | Rapa + Tam  | 4           | 94.6614         | 0.0847  | -13.6730     | 203.00       | 0.2968            | -46.9841               | 236.31                 |
| Tam         | Rapa        | 4           | -10.3328        | 0.8620  | -130.47      | 109.81       | 0.9981            | -167.02                | 146.36                 |
| Tam         | Rapa + Tam  | 4           | 5.2094          | 0.9274  | -110.42      | 120.84       | 0.9997            | -145.53                | 155.95                 |
| Rapa        | Rapa + Tam  | 4           | 15.5422         | 0.7797  | -96.432      | 127.52       | 0.9921            | -130.96                | 162.04                 |
| Control     | Tam         | 5           | -6.6286         | 0.9022  | -118.36      | 105.11       | 0.9993            | -147.97                | 134.71                 |
| Control     | Rapa        | 5           | 182.32          | 0.0011  | 83.8828      | 280.76       | 0.0016            | 57.8023                | 306.84                 |
| Control     | Rapa + Tam  | 5           | 192.28          | 0.0004  | 98.4141      | 286.15       | 0.0004            | 73.5454                | 311.01                 |
| Tam         | Rapa        | 5           | 188.95          | 0.0015  | 82.9197      | 294.98       | 0.0026            | 54.8278                | 323.08                 |
| Tam         | Rapa + Tam  | 5           | 198.91          | 0.0007  | 96.5687      | 301.25       | 0.0009            | 69.4550                | 328.36                 |
| Rapa        | Rapa + Tam  | 5           | 9.9571          | 0.8308  | -86.544      | 106.46       | 0.9964            | -112.11                | 132.03                 |
| Control     | Tam         | 6           | -102.71         | 0.1008  | -226.62      | 21.2027      | 0.3372            | -263.78                | 58.3567                |
| Control     | Rapa        | 6           | 285.53          | <.0001  | 171.91       | 399.14       | <.0001            | 136.98                 | 434.08                 |
| Control     | Rapa + Tam  | 6           | 289.90          | <.0001  | 181.56       | 398.23       | <.0001            | 148.25                 | 431.54                 |
| Tam         | Rapa        | 6           | 388.24          | <.0001  | 268.10       | 508.38       | <.0001            | 231.55                 | 544.92                 |
| Tam         | Rapa + Tam  | 6           | 392.61          | <.0001  | 276.98       | 508.24       | <.0001            | 241.86                 | 543.35                 |
| Rapa        | Rapa + Tam  | 6           | 4.3720          | 0.9372  | -107.60      | 116.35       | 0.9998            | -142.13                | 150.87                 |

\* Tukey's procedure was used to adjust for multiple comparisons.

**Table S5:** Treatment comparisons of tumor volumes at selected time points  
MCF7-LPCX cell line, MFP xenografts

| Treatment X | Treatment Y | Time (week) | Mean Difference | P value | Lower 95% CI | Upper 95% CI | Adjusted P value* | Adjusted Lower 95% CI* | Adjusted Upper 95% CI* |
|-------------|-------------|-------------|-----------------|---------|--------------|--------------|-------------------|------------------------|------------------------|
| Control     | Tam         | 4           | 24.8565         | 0.1181  | -6.7472      | 56.4601      | 0.3789            | -15.9922               | 65.7051                |
| Control     | Rapa        | 4           | 16.1658         | 0.3264  | -17.0526     | 49.3842      | 0.7500            | -26.7669               | 59.0985                |
| Control     | Rapa + Tam  | 4           | 12.4757         | 0.4276  | -19.3311     | 44.2825      | 0.8515            | -28.6525               | 53.6039                |
| Tam         | Rapa        | 4           | -8.6906         | 0.5954  | -41.9091     | 24.5278      | 0.9494            | -51.6234               | 34.2421                |
| Tam         | Rapa + Tam  | 4           | -12.3807        | 0.4311  | -44.1876     | 19.4261      | 0.8543            | -53.5089               | 28.7475                |
| Rapa        | Rapa + Tam  | 4           | -3.6901         | 0.8213  | -36.9211     | 29.5409      | 0.9958            | -46.6616               | 39.2814                |
| Control     | Tam         | 5           | 54.8326         | 0.0010  | 25.6087      | 84.0564      | 0.0014            | 17.8982                | 91.7669                |
| Control     | Rapa        | 5           | 46.7484         | 0.0050  | 16.0197      | 77.4771      | 0.0124            | 7.9115                 | 85.5854                |
| Control     | Rapa + Tam  | 5           | 49.8880         | 0.0024  | 20.0872      | 79.6889      | 0.0052            | 12.0599                | 87.7162                |
| Tam         | Rapa        | 5           | -8.0841         | 0.5872  | -38.8129     | 22.6446      | 0.9454            | -46.9211               | 30.7528                |
| Tam         | Rapa + Tam  | 5           | -4.9445         | 0.7323  | -34.7453     | 24.8563      | 0.9855            | -42.7727               | 32.8836                |
| Rapa        | Rapa + Tam  | 5           | 3.1396          | 0.8346  | -27.9046     | 34.1838      | 0.9966            | -36.2374               | 42.5167                |
| Control     | Tam         | 6           | 84.8087         | <.0001  | 53.2050      | 116.41       | <.0001            | 43.9600                | 125.66                 |
| Control     | Rapa        | 6           | 77.3310         | <.0001  | 44.1126      | 110.55       | <.0001            | 34.3983                | 120.26                 |
| Control     | Rapa + Tam  | 6           | 87.3004         | <.0001  | 53.8679      | 120.73       | <.0001            | 43.7864                | 130.81                 |
| Tam         | Rapa        | 6           | -7.4776         | 0.6475  | -40.6960     | 25.7408      | 0.9668            | -50.4104               | 35.4551                |
| Tam         | Rapa + Tam  | 6           | 2.4917          | 0.8801  | -30.9408     | 35.9242      | 0.9987            | -41.0222               | 46.0057                |
| Rapa        | Rapa + Tam  | 6           | 9.9694          | 0.5619  | -24.7432     | 44.6819      | 0.9357            | -35.1804               | 55.1191                |

\* Tukey's procedure was used to adjust for multiple comparisons.

**Table S6.** Treatment comparisons of tumor volumes at selected time points  
-MCF7-HOXB13 cell line, MFP xenografts

| Treatment X | Treatment Y | Time (week) | Mean Difference | P value | Lower 95% CI | Upper 95% CI | Adjusted P value* | Adjusted Lower 95% CI* | Adjusted Upper 95% CI* |
|-------------|-------------|-------------|-----------------|---------|--------------|--------------|-------------------|------------------------|------------------------|
| Control     | Tam         | 4           | 17.0439         | 0.4612  | -29.4779     | 63.5658      | 0.8780            | -43.6953               | 77.7832                |
| Control     | Rapa        | 4           | 89.4076         | 0.0016  | 36.7246      | 142.09       | 0.0058            | 20.8538                | 157.96                 |
| Control     | Rapa + Tam  | 4           | 88.3532         | 0.0005  | 41.4508      | 135.26       | 0.0019            | 27.1393                | 149.57                 |
| Tam         | Rapa        | 4           | 72.3637         | 0.0050  | 23.4858      | 121.24       | 0.0204            | 8.5534                 | 136.17                 |
| Tam         | Rapa + Tam  | 4           | 71.3092         | 0.0029  | 26.0907      | 116.53       | 0.0122            | 12.1960                | 130.42                 |
| Rapa        | Rapa + Tam  | 4           | -1.0545         | 0.9650  | -49.5865     | 47.4775      | 1.0000            | -64.4334               | 62.3245                |
| Control     | Tam         | 5           | 44.7947         | 0.0330  | 4.0410       | 85.5485      | 0.1096            | -6.7568                | 96.3463                |
| Control     | Rapa        | 5           | 182.66          | <.0001  | 135.46       | 229.86       | <.0001            | 122.96                 | 242.37                 |
| Control     | Rapa + Tam  | 5           | 183.94          | <.0001  | 142.75       | 225.14       | <.0001            | 131.83                 | 236.05                 |
| Tam         | Rapa        | 5           | 137.87          | <.0001  | 95.0240      | 180.71       | <.0001            | 83.6729                | 192.06                 |
| Tam         | Rapa + Tam  | 5           | 139.15          | <.0001  | 99.9171      | 178.38       | <.0001            | 89.5227                | 188.77                 |
| Rapa        | Rapa + Tam  | 5           | 1.2821          | 0.9501  | -41.1578     | 43.7220      | 0.9999            | -52.4024               | 54.9666                |
| Control     | Tam         | 6           | 72.5455         | 0.0033  | 26.0237      | 119.07       | 0.0133            | 11.8063                | 133.28                 |
| Control     | Rapa        | 6           | 275.91          | <.0001  | 223.23       | 328.60       | <.0001            | 207.36                 | 344.47                 |
| Control     | Rapa + Tam  | 6           | 279.53          | <.0001  | 232.63       | 326.43       | <.0001            | 218.32                 | 340.75                 |
| Tam         | Rapa        | 6           | 203.37          | <.0001  | 154.49       | 252.25       | <.0001            | 139.56                 | 267.18                 |
| Tam         | Rapa + Tam  | 6           | 206.99          | <.0001  | 161.77       | 252.21       | <.0001            | 147.87                 | 266.10                 |
| Rapa        | Rapa + Tam  | 6           | 3.6187          | 0.8803  | -44.9133     | 52.1507      | 0.9987            | -59.7603               | 66.9976                |

\* Tukey's procedure was used to adjust for multiple comparisons.
